# Supplementary material
Source: MDPI journal article supplement (https://www.mdpi.com/2673-4605/4/1/58)
Supplement: s1 [file s1]

# A new nanomedicine platform to deliver a carnitine palmitoyl-transferase 1 (CPT1) inhibitor into glioma cells and hypothalamic neurons

Paraiso, W.K.D.<sup>1\*</sup>, Garcia-Chica, J.<sup>2,3</sup>, Ariza, X.<sup>3</sup>, Garcia, J.<sup>3</sup>, Kataoka, K. <sup>1</sup>, Rodriguez-Rodriguez, R.<sup>2</sup>, and Quader, S.<sup>1</sup>

<sup>1</sup>Innovation Center of Nanomedicine, Kawasaki Institute of Industrial Promotion, Kawasaki, Japan

<sup>2</sup>Department of Basic Sciences, Faculty of Medicine & Health Sciences, Universitat Internacional de Catalunya, Sant Cugat del Vallès, Spain

<sup>3</sup>Department of Inorganic & Organic Chemistry, Faculty of Chemistry, Institut de Biomedicina de la Universitat de Barcelona (IBUB), Universitat de Barcelona, Barcelona, Spain

\* ✉ west-p@kawasaki-net.ne.jp

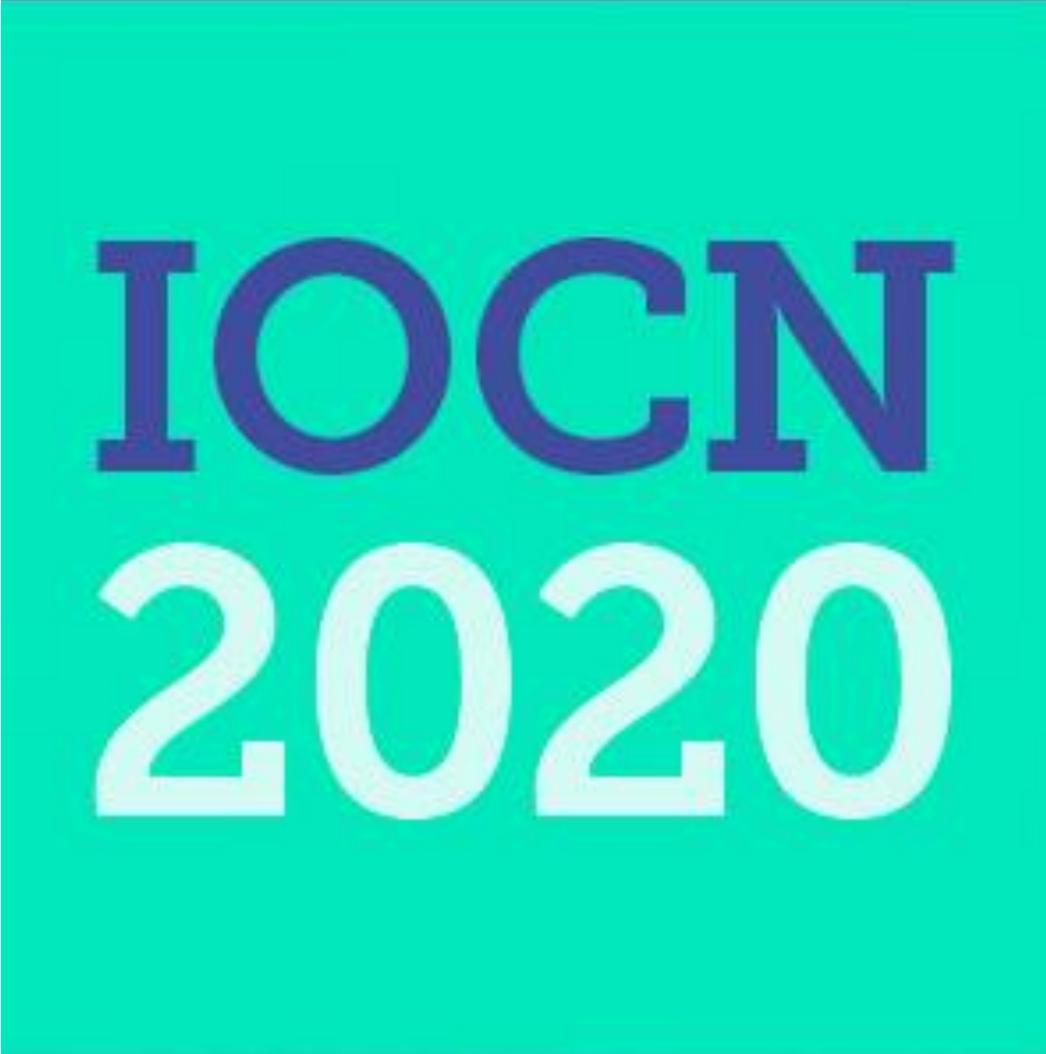

2<sup>nd</sup> INTERNATIONAL ONLINE-  
CONFERENCE ON  
NANOMATERIALS

## INTRODUCTION

Obesity and glioblastoma multiforme (GB) are two unmet medical needs which are linked by cellular fatty acid (FA) metabolism. **Carnitine palmitoyl transferase 1 (CPT1)**, an enzyme involved in **fatty acid oxidation (FAO)** <sup>1</sup>, is a viable target for both diseases. Inhibition of CPT1 in the hypothalamus contributes to reduced expression of orexigenic proteins and diminished food intake because of neuronal FA-CoA accumulation <sup>2,3</sup>. CPT1 is also crucial to the survival of GB cells, where it is overexpressed <sup>4</sup>. Its inhibition a possible strategy to suppress GB tumor growth <sup>5</sup>.

## OBJECTIVE

**C75-CoA is a strong competitive inhibitor to CPT1** <sup>6</sup>. However, it is polar and negatively charged, having low cell membrane permeability, and therefore needing a delivery system <sup>7</sup> for intracellular transport. Thus, we aim **to deliver C75-CoA through a nanomedicine platform (poly-ion complex [PIC] micelle) into selected brain cells for CPT1 targeting**.

## METHODS

(±)-C75-CoA and its enantio-pure forms (+)- and (-)-C75-CoA were prepared by a thiol-ene reaction between CoA and the corresponding stereoisomer of C75 at pH 8. The adduct was mixed with PEG-PAsp(DET) to form PIC micelles. Cytotoxicity, ATP levels, and cellular uptake were measured in both **U87MG human glioma cells** and **GT1-7 murine hypothalamic neurons**.

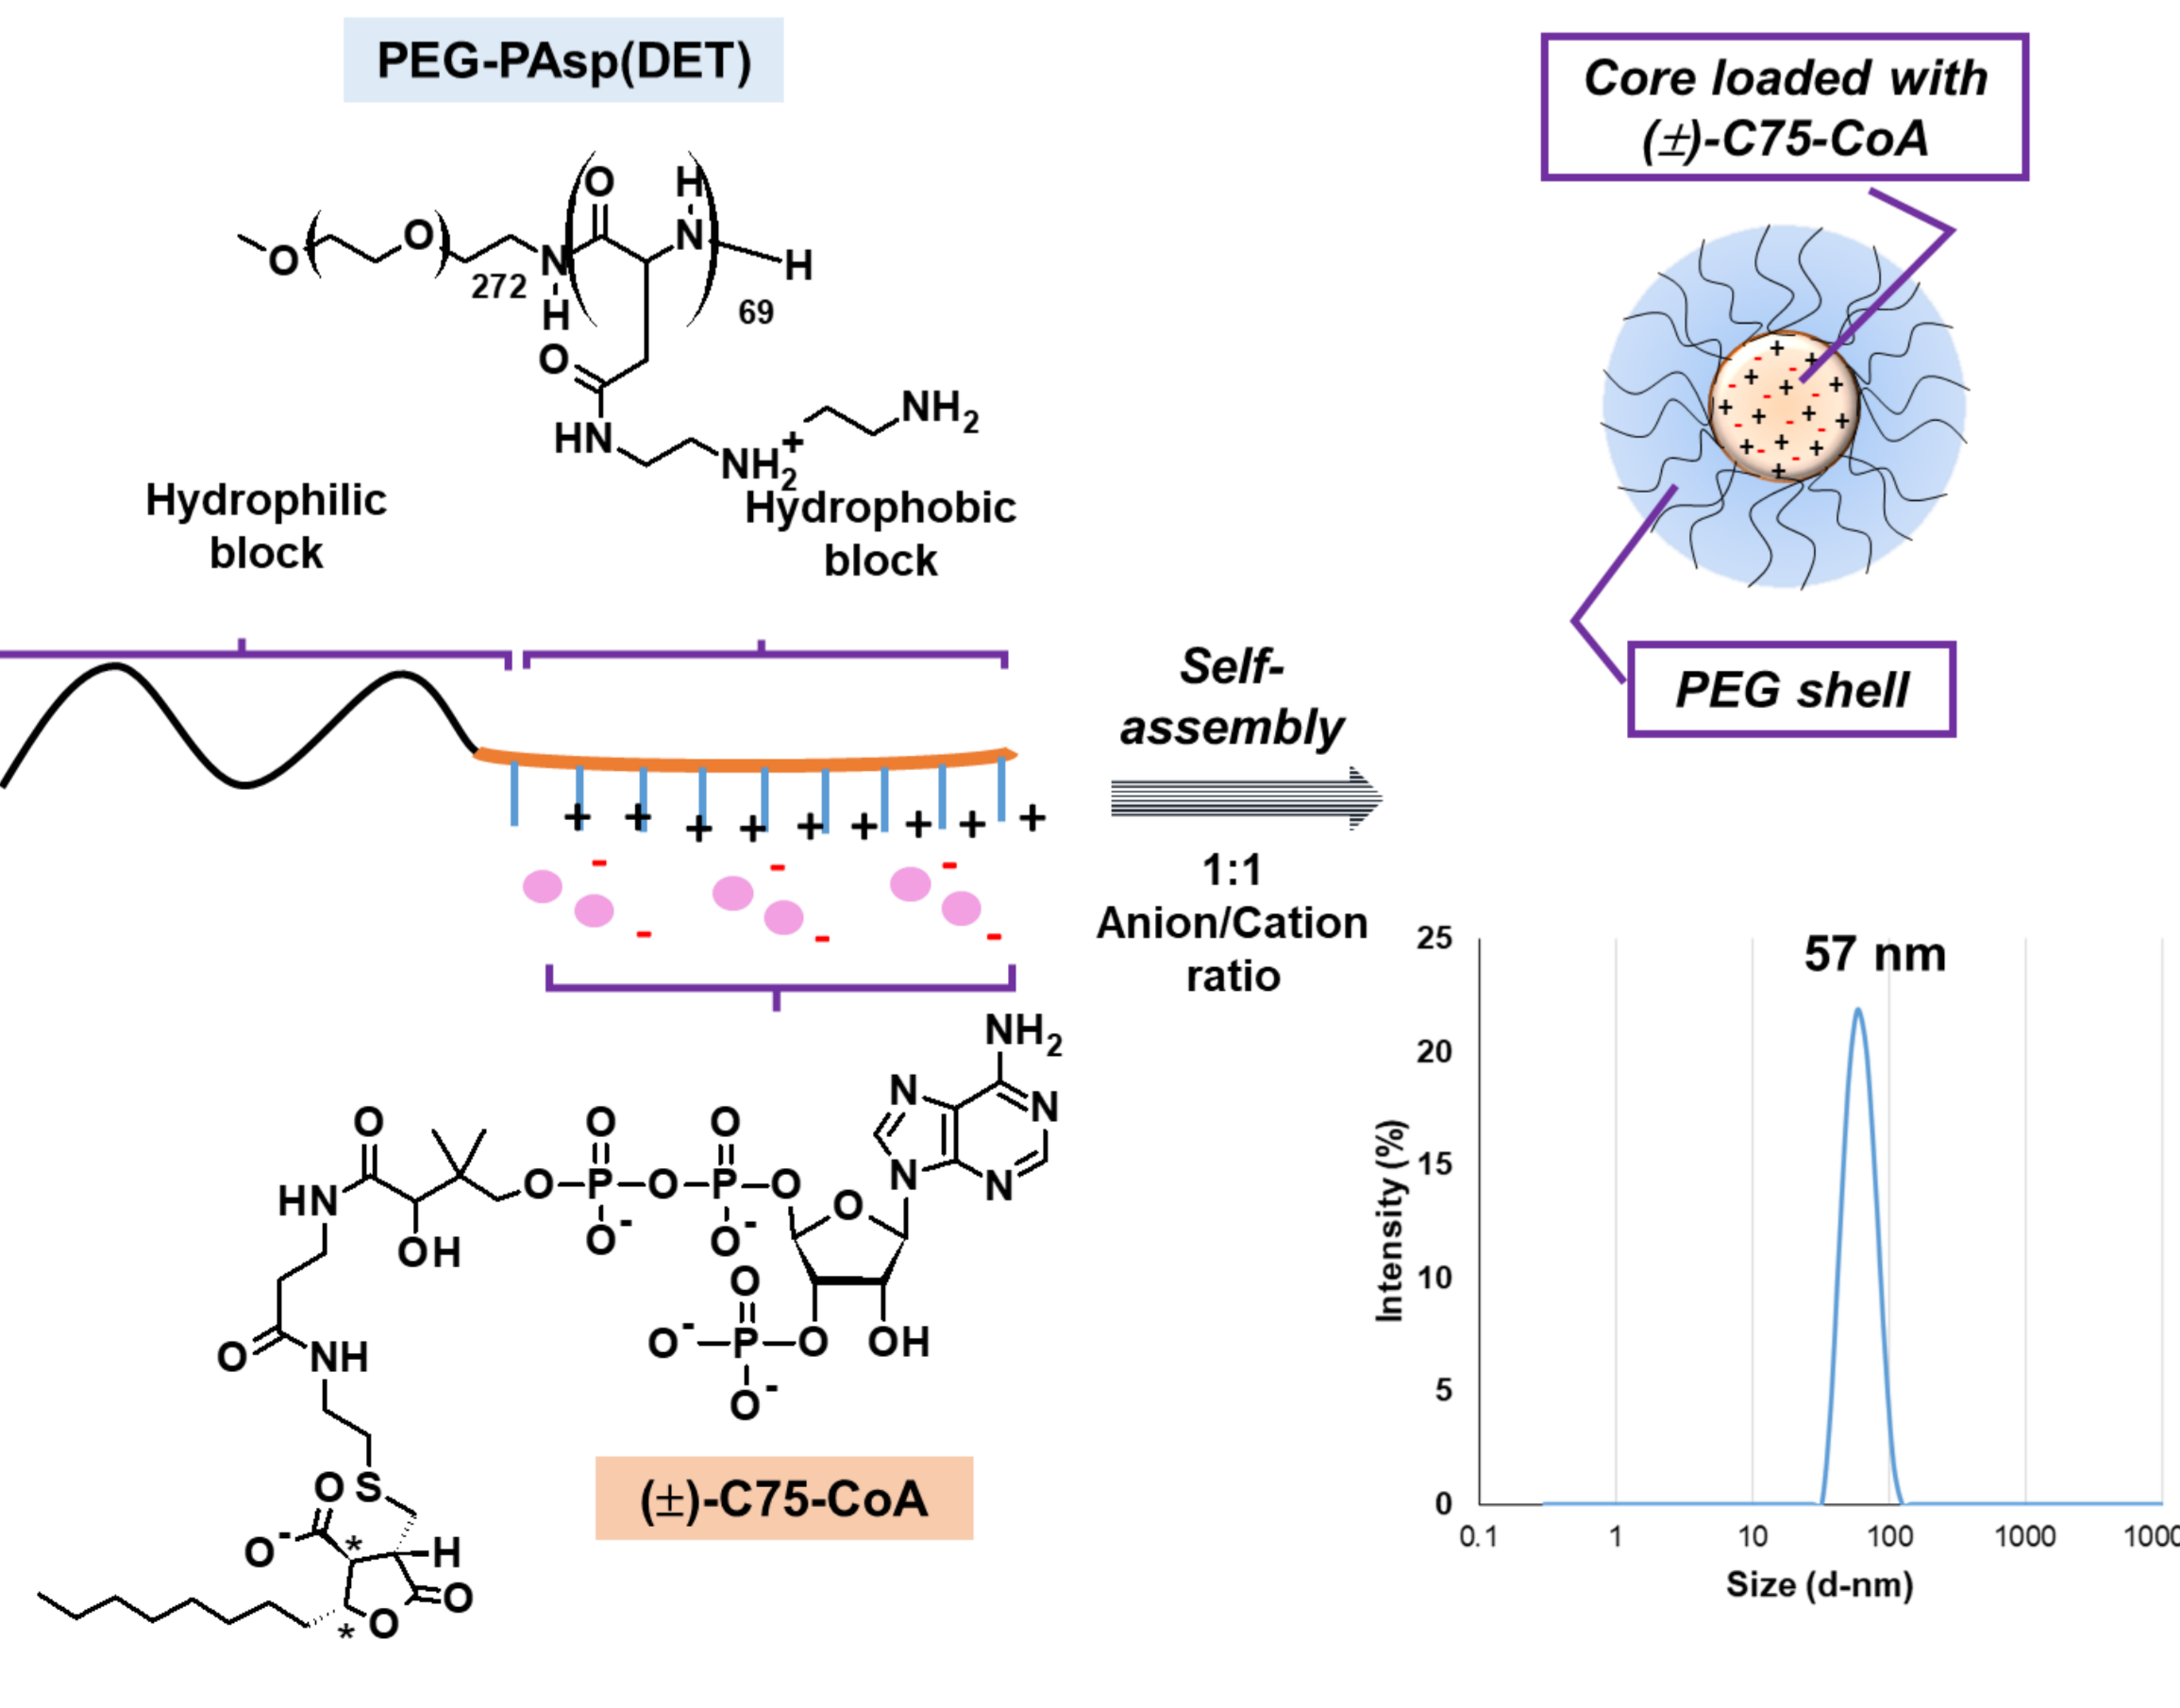

## RESULTS

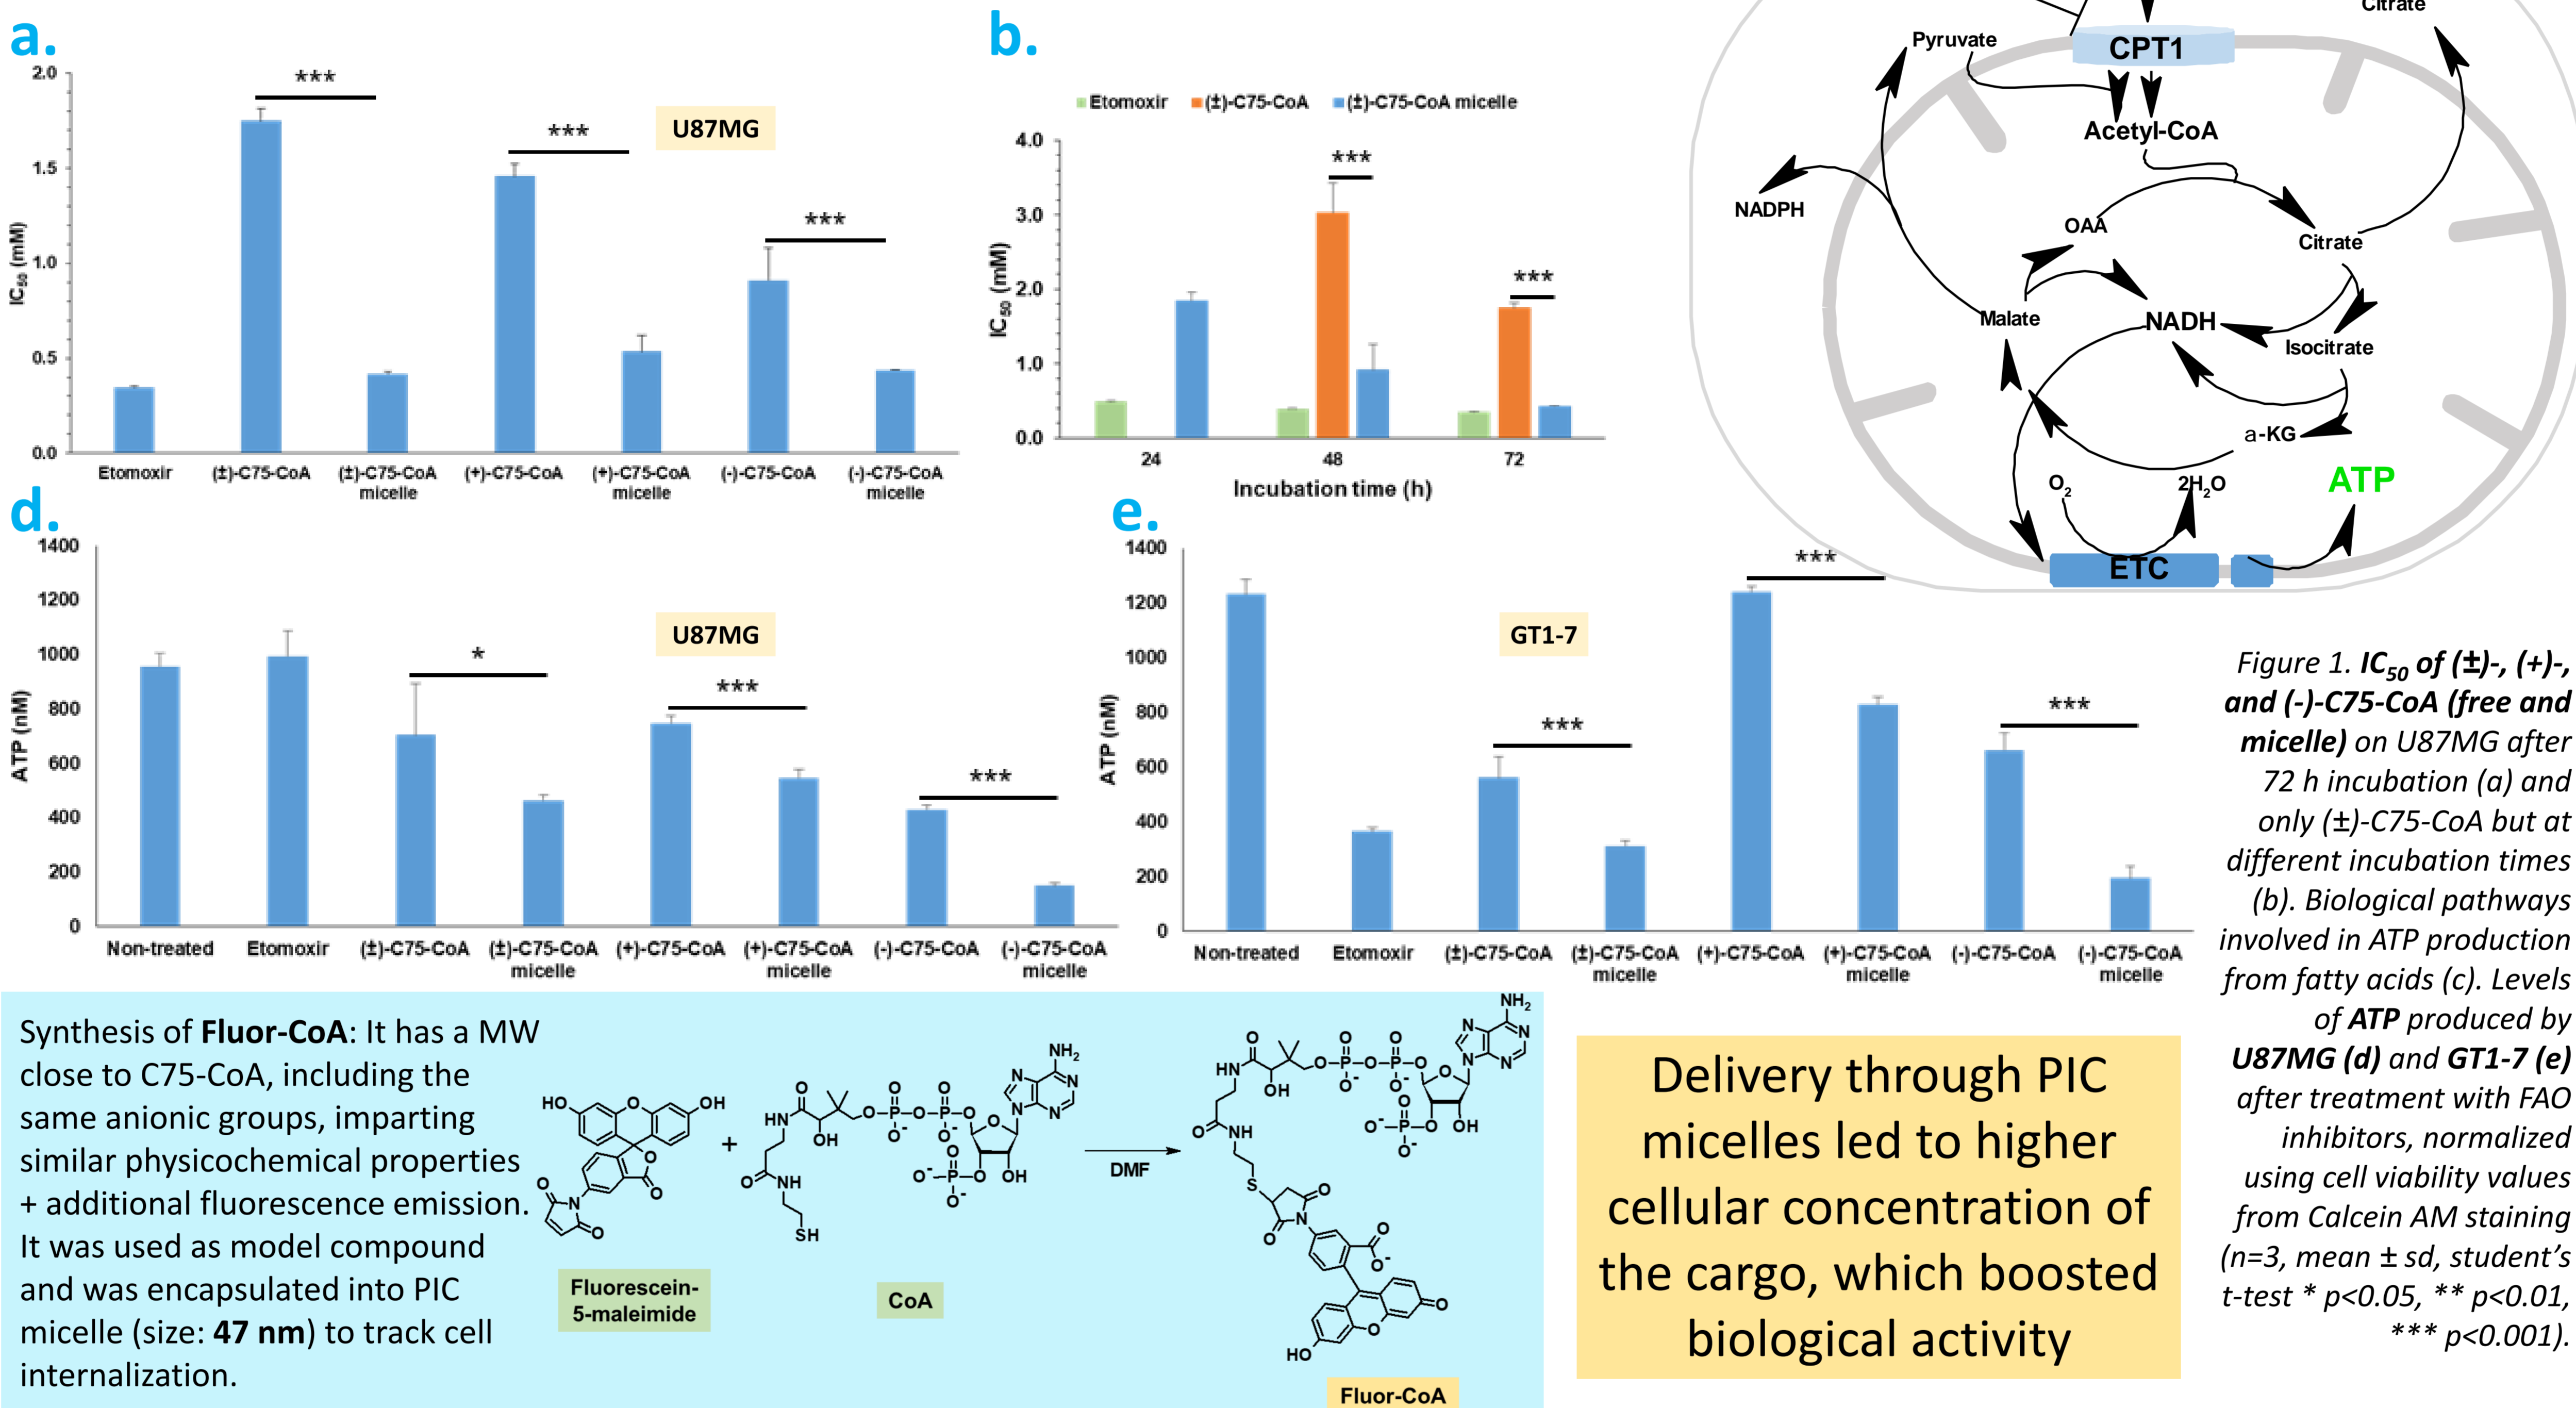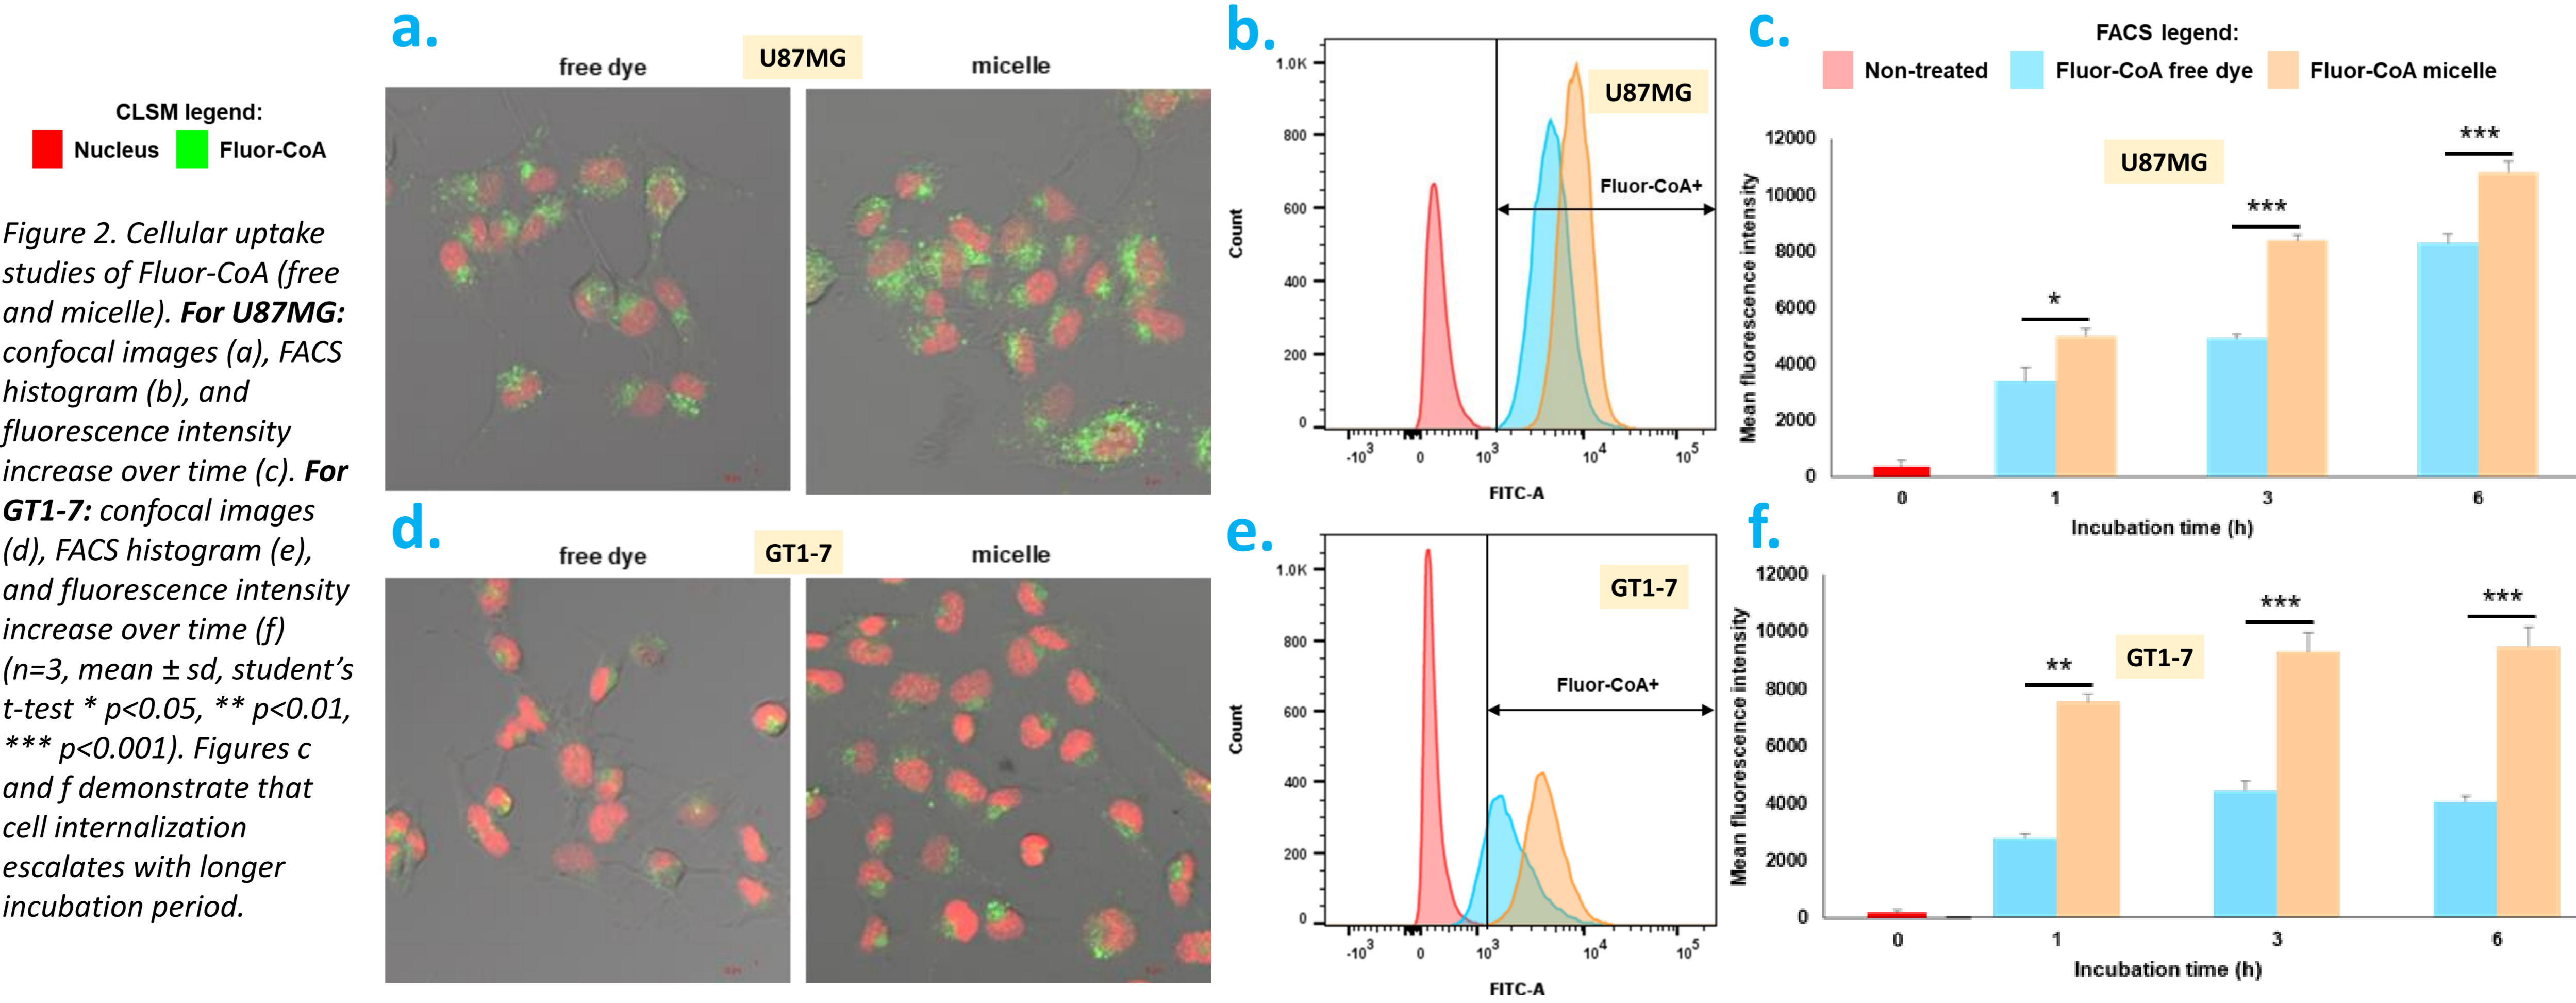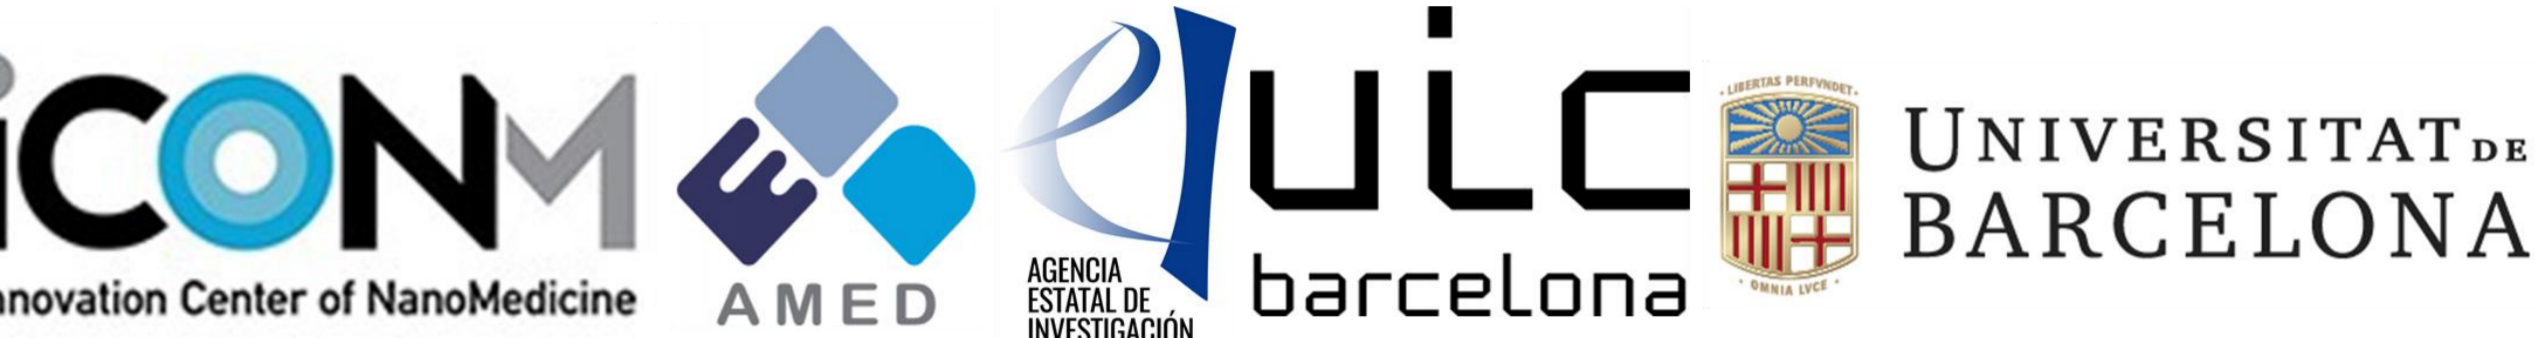

## CONCLUSION

**Biological activity**  
(±)-, (+)-, and (-)-C75-CoA micelle **demonstrated significantly enhanced cytotoxicity against U87MG and lowered metabolic activity** over the free drug in both U87MG and GT1-7. CPT1 inhibition led to reduced FAO, as indicated by lower ATP production.

**Cellular uptake**  
Fluor-CoA micelle showed **more efficient cellular uptake** in both U87MG and GT1-7, in comparison with the free dye. This corroborates the increased biological activity by C75-CoA micelle, because the micelle clearly enhances the intracellular concentration of CoA derivatives.

**Overall**  
The cationic block co-polymer neutralized the negative charge of the CoA derivatives, resulting in a PIC micelle-type system that is effective in delivering small anionic molecules into selected brain cells. This strategy can be extended to deliver other anionic drugs for therapies in several diseases.

## REFERENCES

- Casals, N. *et al. Prog. Lipid Res.* **61** (2016).
- Makowski, K. *et al. Chirality* **25** (2013).
- Obici, S., Feng, Z., Arduini, A., Conti, R. & Rossetti, L. *Nat. Med.* **9** (2003).
- Reilly, P. T. & Mak, T. W. *Clin. Cancer Res.* **18** (2012).
- Cirillo, A. *et al. Cancer Biol. Ther.* **15** (2014).
- Bentebibel, A. *et al. Biochemistry* **45**, (2006).
- Uchida, H. *et al. J. Am. Chem. Soc.* **136** (2014).

## FUNDING

This project is financially supported by the **Joint Bilateral Project Japan-Spain** (PCI2018-092997/Agencia Estatal de Investigacion [AEI] to R Rodriguez-Rodriguez and 20jm0210059h0003/ The Japan Agency for Medical Research and Development [AMED] to S Quader).
